# Supplementary material
Source: publisher figshare collection journal article supplement (https://gsajournals.figshare.com/ndownloader/files/15230714)
Supplement: Supplementary file 1 [file 15230714]

## Sheet: Sheet1
Table S3: AICc Results from Phylogenetic Model Testing: Evolutionary model testing using fitContinous estimated the likelihood of each model (Ornstein-Uhlenbeck (OU), Brownian motion (BM), and the white noise model (White). According to AICc values, the mostly likely model for trait evolution for female and male genome size and sex difference was OU across the entire Drosophila genus and the two …
Female Genome Size
	All Species	Drosophila	Sophophora
OU*	1528.19	730.64	732.13
BM	1536.2	743.02	735.96
White	1562.7	735.47	754.46
Male Genome Size
	All Species	Drosophila	Sophophora
OU*	1532.25	736.6	734.44
BM	1540.79	746.49	738.37
White	1571.05	744.78	758.08
Sex Difference
	All Species	Drosophila	Sophophora
OU*	1248.12	566.96	612.12
BM	1300.42	576.04	652.41
White	1255.78	576.82	610.77
